# Supplementary material for: Differential Spreading of Microsatellites in Holocentric Chromosomes of Chagas Disease Vectors: Genomic and Evolutionary Implications
Source: MDPI journal article supplement (doi:10.3390/insects14090772), 2023-09-19
Supplement: s1 [file s1]

# Differential Spreading of Microsatellites in Holocentric Chromosomes of Chagas Disease Vectors: Genomic and Evolutionary Implications

**Table S1.** Geographic origin of the individuals studied.

| Tribe Triatomini      | Species                                         | Geographic origin                                                                                                                    |
|-----------------------|-------------------------------------------------|--------------------------------------------------------------------------------------------------------------------------------------|
|                       | <b>South American lineage</b>                   |                                                                                                                                      |
| infestans complex     | <i>Triatoma infestans</i><br>(Andean group)     | Bolivia, Potosí, Palquiza, Sylvatic. 21°31'41"S, 65°45'04"W<br>Bolivia, La Paz, Loayza, Sapini, Peridomestic. 16°48'55"S, 67°42'21"W |
|                       | <i>Triatoma infestans</i><br>(non-Andean group) | Argentina, Chaco, Tres Estacas, Per. 26°54'30"S, 51°40'23"W<br>Argentina, Santiago del Estero, Silipica, Per. 28°13'25"S, 64°07'13"W |
|                       | <i>Triatoma delpontei</i>                       | Bolivia, Santa Cruz, Tita, S. 18°34'31"S, 62°40'05"W                                                                                 |
| rubrovaria complex    | <i>Triatoma patagonica</i>                      | Argentina, Santiago del Estero, Mitre, Per. 29°24'50"S, 62°47'23"W                                                                   |
| sordida complex       | <i>Triatoma sordida</i>                         | Brazil, Minas Gerais, Montes Claros, Per. <b>16°44'6"S, 43°51'42"W</b>                                                               |
|                       | <b>Dispar lineage</b>                           |                                                                                                                                      |
|                       | <i>Triatoma boliviana</i>                       | Bolivia, La Paz, Muñecas, Chuma, Per. 15°28'51"S, 68°53'54"W                                                                         |
|                       | <i>Triatoma carrioni</i>                        | Perú, Piura, Ayabaca, Socchabamba, S. 4°35'43"S, 79°40'09"W                                                                          |
|                       | <b>North American lineage</b>                   |                                                                                                                                      |
| protracta complex     | <i>Triatoma barberi</i>                         | Mexico, Querétaro, La Cueva. Per. 20°29'04"N, 100°26'20"W                                                                            |
|                       | <i>Triatoma protracta</i>                       | USA, Arizona. Insectary Justin Schmidt.                                                                                              |
| dimidiata complex     | <i>Triatoma dimidiata</i>                       | Guatemala, Baja Verapaz, different localities. Domestic.                                                                             |
| nitida complex        | <i>Triatoma nitida</i>                          | Guatemala, Quiché, Zacualpa, D. 15°01'34"N, 90°52'42"W                                                                               |
|                       | <i>Triatoma rubida</i>                          | USA, Arizona, Tucson, S.                                                                                                             |
| phyllosoma complex    | <i>Triatoma recurva</i>                         | USA, Arizona, Tucson, S.                                                                                                             |
|                       | <i>Triatoma gerstaeckeri</i>                    | USA, Texas, Frio Cave, S.                                                                                                            |
| rubrofasciata complex | <i>Triatoma rubrofasciata</i>                   | Vietnam, Hanoi, Tu Liem district. Per. 21°02'48"N, 105°44'54"E                                                                       |
| (uncertain complex)   | <i>Triatoma sanguisuga</i>                      | USA, Louisiana, S.                                                                                                                   |
| lecticularia complex  | <i>Paratriatoma lecticularia</i>                | USA, Texas, S.                                                                                                                       |
| spinolai complex      | <i>Mepraia spinolai</i>                         | Chile, Atacama, Chañaral, Inca Oro, D. 26°45'20"S, 69°54'16"W                                                                        |

|                                       |                                                                                                                       |
|---------------------------------------|-----------------------------------------------------------------------------------------------------------------------|
| <i>Panstrongylus chinai</i>           | Perú, Lambayeque, Chiclayo, Zaña, D. 6°54'15"S, 79°34'27"W                                                            |
| <i>Panstrongylus geniculatus</i>      | Colombia, Santander, Bucaramanga, S. 7°07'31"N, 73°7'11"W                                                             |
| <i>Panstrongylus lutzi</i>            | Brazil, Ceará, Várzea Alegre, Per. 06°47'20"S, 39°17'00"W                                                             |
| <i>Panstrongylus megistus</i>         | Brazil, Rio de Janeiro, Botanical Garden, S.                                                                          |
| <i>Panstrongylus noireau</i>          | Bolivia, La Paz, Muñecas, Camata, Per. 15°14'22"S, 68°44'52"W                                                         |
| <i>Panstrongylus rufotuberculatus</i> | Colombia, La Guajira, Gumake, Per. 111°12'15"N, 73°14'58"W<br>Colombia, Antioquia, Amalfi, Per. 6°54'33"N, 75°04'36"W |
| <b>Tribe Rhodniini</b>                |                                                                                                                       |
| <b>Prolixus lineage</b>               |                                                                                                                       |
| <i>Rhodnius prolixus</i>              | Colombia, S. Insectary CDC, Atlanta, USA.                                                                             |
| <b>Pallescens lineage</b>             |                                                                                                                       |
| <i>Rhodnius ecuadoriensis</i>         | Perú, La Libertad, Gran Chimú, Simbrón, D. 7°33'13"S, 78°33'26"W                                                      |
